# Supplementary material for: One Dimensional AuAg Nanostructures as Anodic Catalysts in the Ethylene Glycol Oxidation
Source: PubMed Central journal article supplement (PMC7221585; doi:10.3390/nano10040719), 2020-04-10
Supplement: nanomaterials-10-00719-s001.pdf [file nanomaterials-10-00719-s001.pdf]

## Supplementary Materials

# One Dimensional AuAg Nanostructures as Anodic Catalysts in the Ethylene Glycol Oxidation

Daniel K. Kehoe, Luis Romeral, Ross Lundy, Michael A. Morris, Michael G. Lyons and Yurii K. Gun'ko \*

School of Chemistry, Trinity College Dublin, Dublin, Dublin 2, Ireland; kehoeda@tcd.ie (D.K.); ROMERALA@tcd.ie (L.R.); LUNDYRO@tcd.ie (R.L.); MORRISM2@tcd.ie (M.M.); MELYONS@tcd.ie (M.L.)

\* Correspondence: IGOUNKO@tcd.ie; Tel.: +353-1-896-3543

Received: 28 February 2020; Accepted: 6 April 2020; Published: date

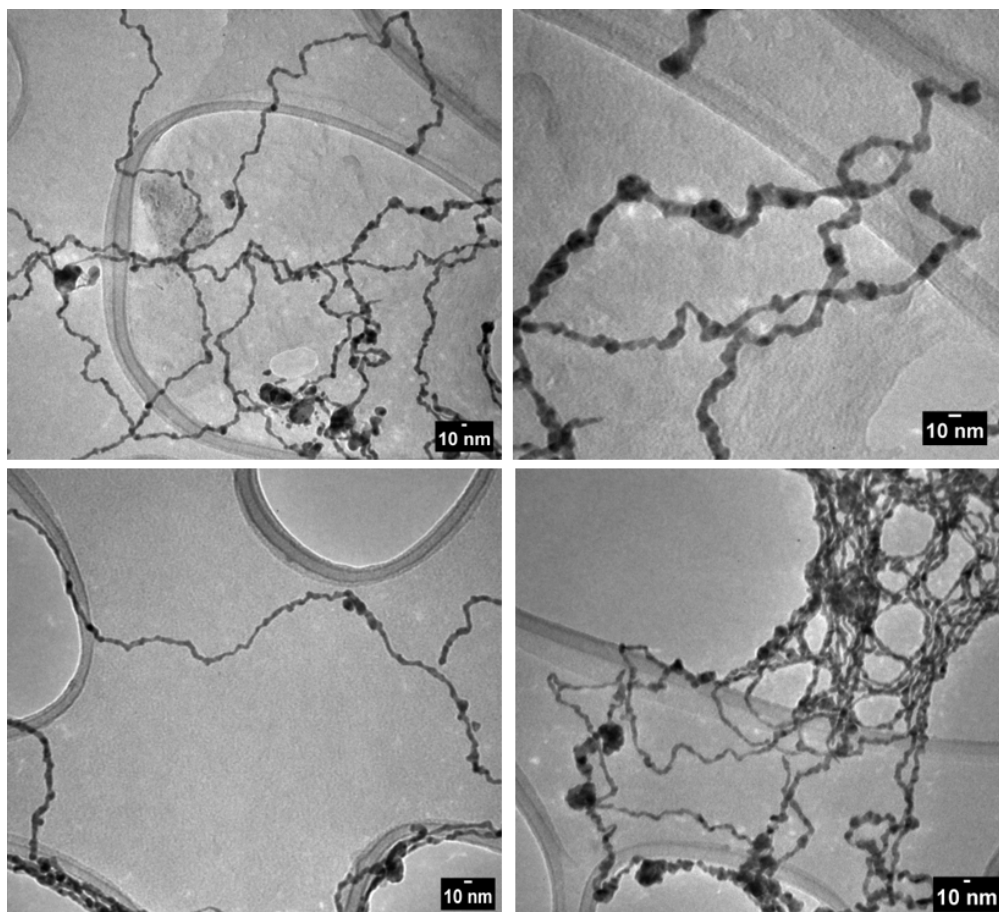

**Figure S1:** TEM images of nanowires produced following dilution after aging at 20 °C for 18 h.

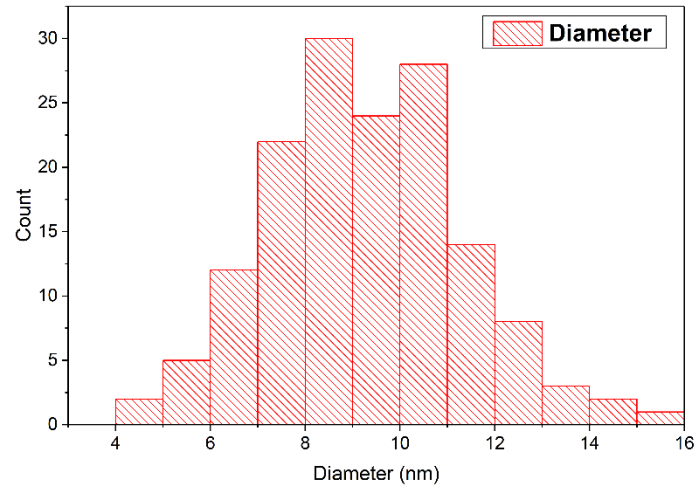

**Figure S2:** Size distribution of ultrathin AuAg NWs produced following dilution after aging at 20 °C for 18 h with average diameter of  $9.2 \pm 2$  nm.

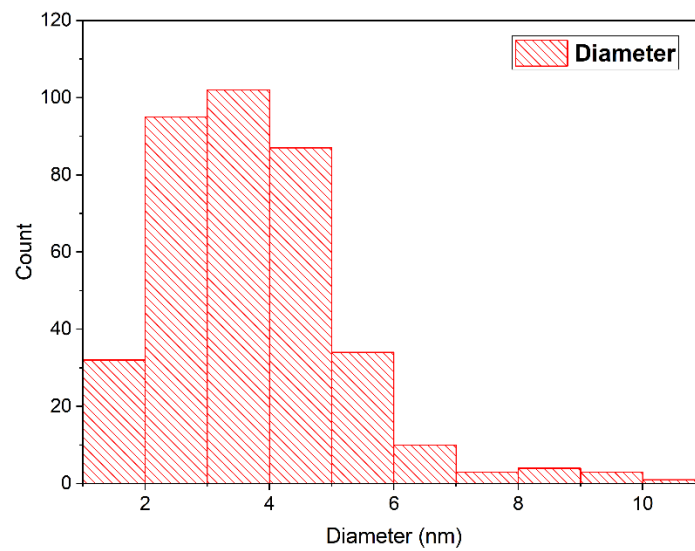

**Figure S3:** Size distribution of ultrathin AuAg NWs produced following dilution after aging at 25 °C for 18 h with average diameter of  $3.8 \pm 1.6$  nm.

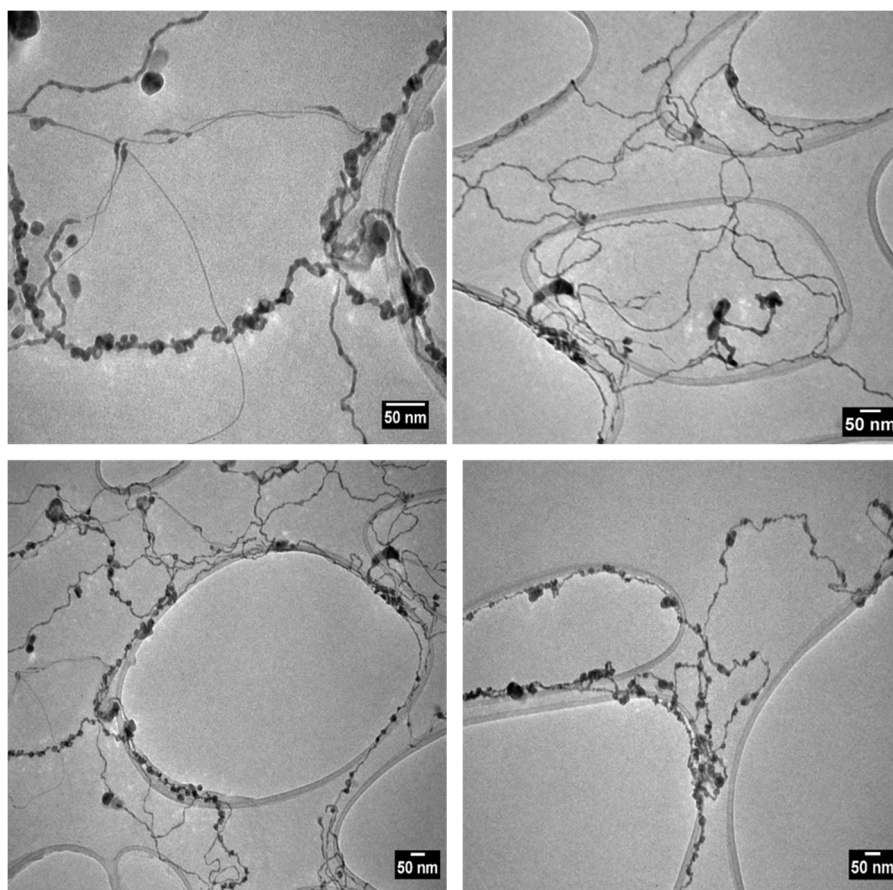

**Figure S4:** TEM images of nanowires produced following dilution after aging at 30 °C for 18 h.

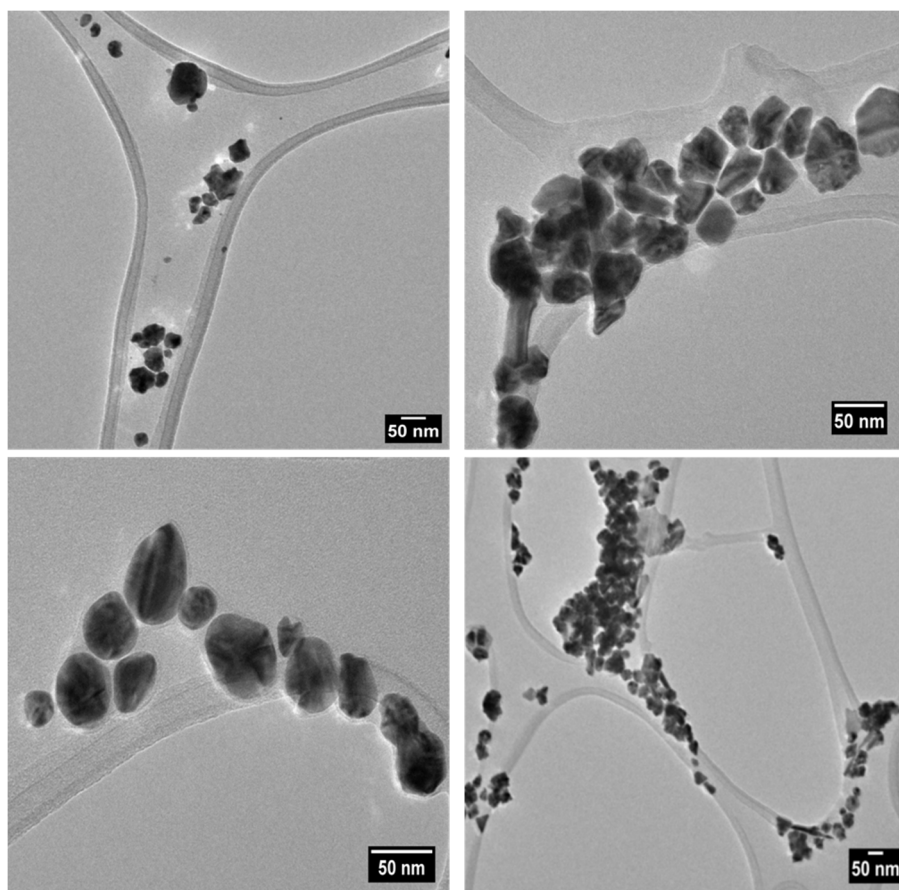

**Figure S5:** TEM images of nanoparticles produced following dilution after aging at 40 °C for 18 h.

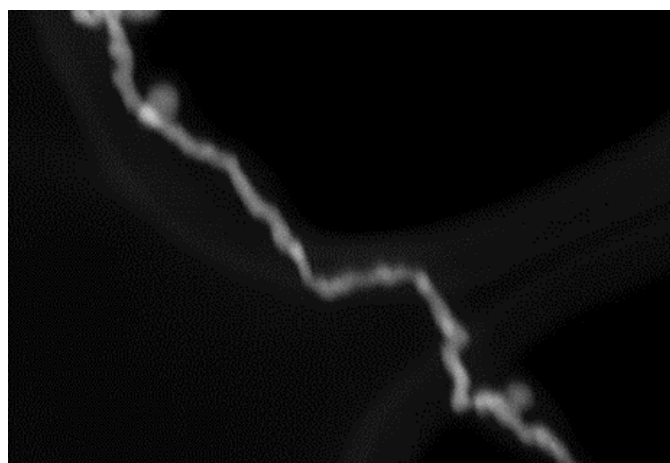

**Figure S6:** STEM image of nanowires produced following dilution after aging at 20 °C for 18 h.

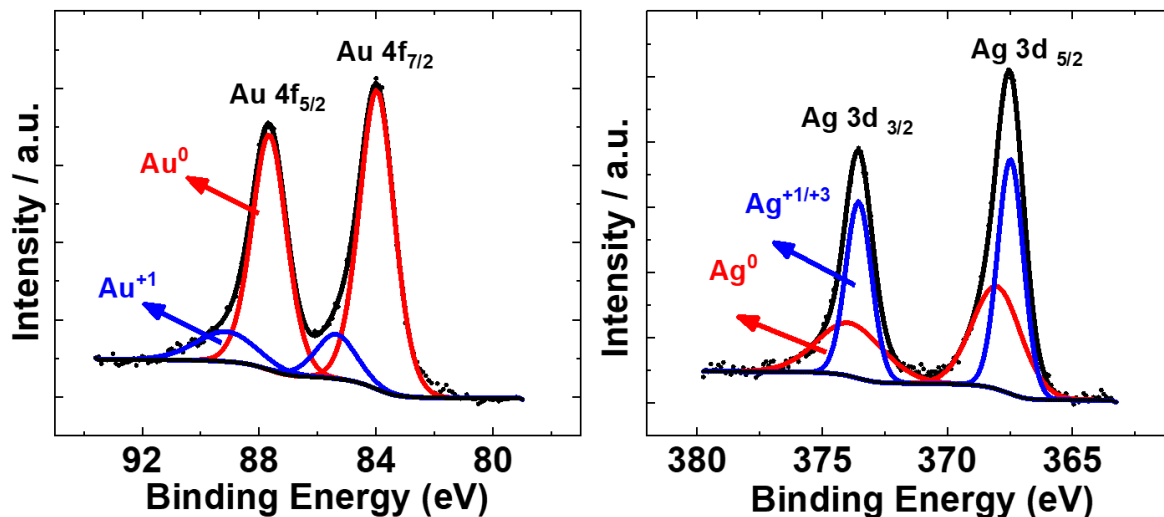

Figure S7: XPS analysis of nanowires produced following dilution after aging at 20 °C for 18 h.

#### Durability calculation of AuAg NWs from chrono-amperimetric $I$ - $T$ curves

$$\frac{i_t}{i_0} \times 100\%$$

9.2 nm AuAg NWs

$$\frac{0.0047}{0.0142} \times 100\% = 33\%$$

3.8 nm AuAg NWs

$$\frac{0.0033}{0.006} \times 100\% = 55\%$$
